# Supplementary material for: The Antimicrobial Compound Xantholysin Defines a New Group of Pseudomonas Cyclic Lipopeptides
Source: PubMed Central journal article supplement (PMC3656897; doi:10.1371/journal.pone.0062946), 2013-05-17
Supplement: pone.0062946.s004.pdf [file pone.0062946.s004.pdf]

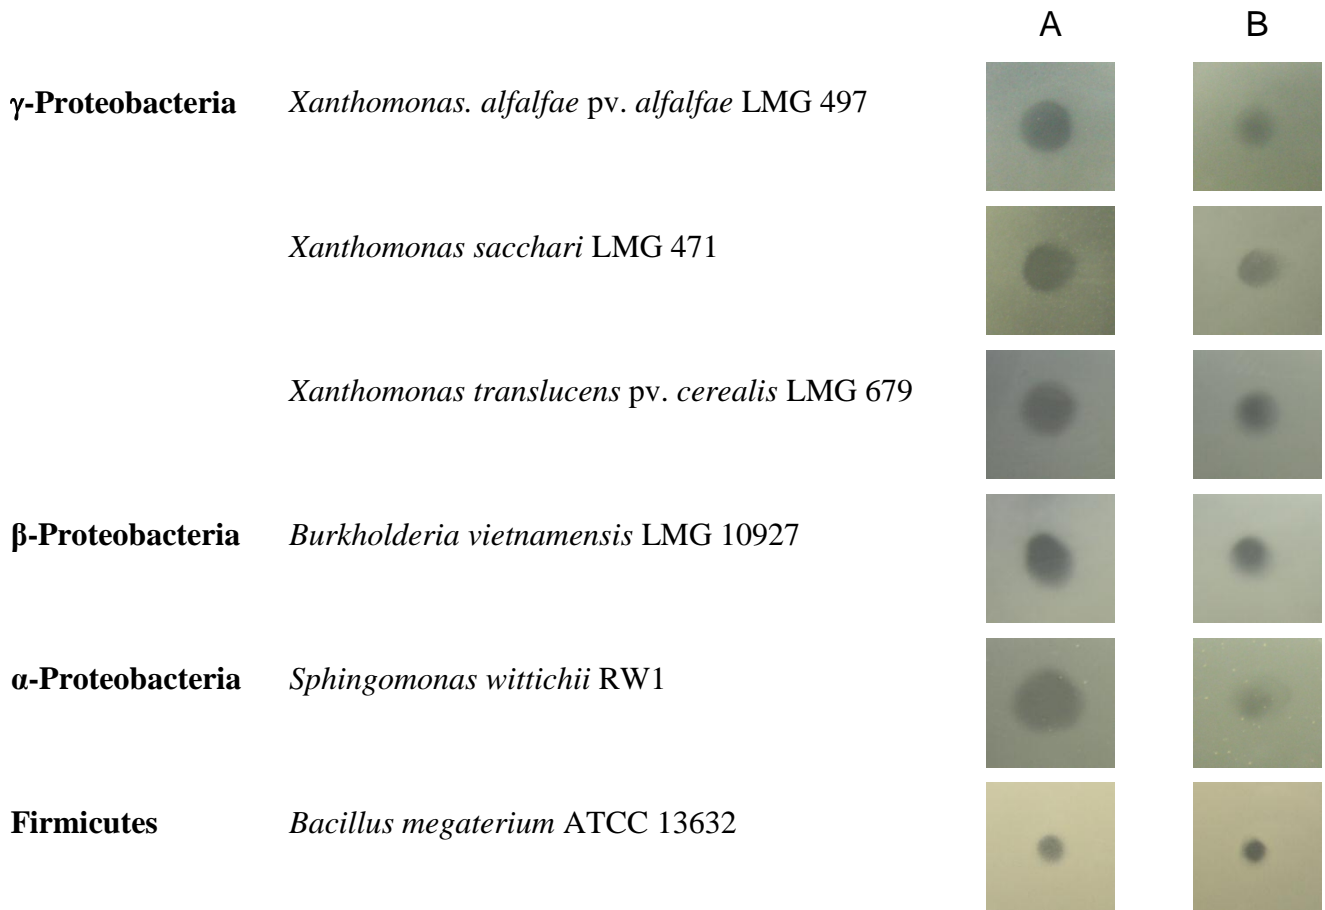

**Figure S4. Growth inhibition of representative indicator bacteria by purified xantholysin.** 10  $\mu$ l-samples of purified xantholysin in methanol, containing 18  $\mu$ g (A) or 9  $\mu$ g (B) were spotted on an agar plate and overlaid with indicator cells after solvent evaporation. Methanol control spots did not cause growth inhibition.
