# Supplementary material for: The Antimicrobial Compound Xantholysin Defines a New Group of Pseudomonas Cyclic Lipopeptides
Source: PubMed Central journal article supplement (PMC3656897; doi:10.1371/journal.pone.0062946), 2013-05-17
Supplement: pone.0062946.s006.pdf [file pone.0062946.s006.pdf]

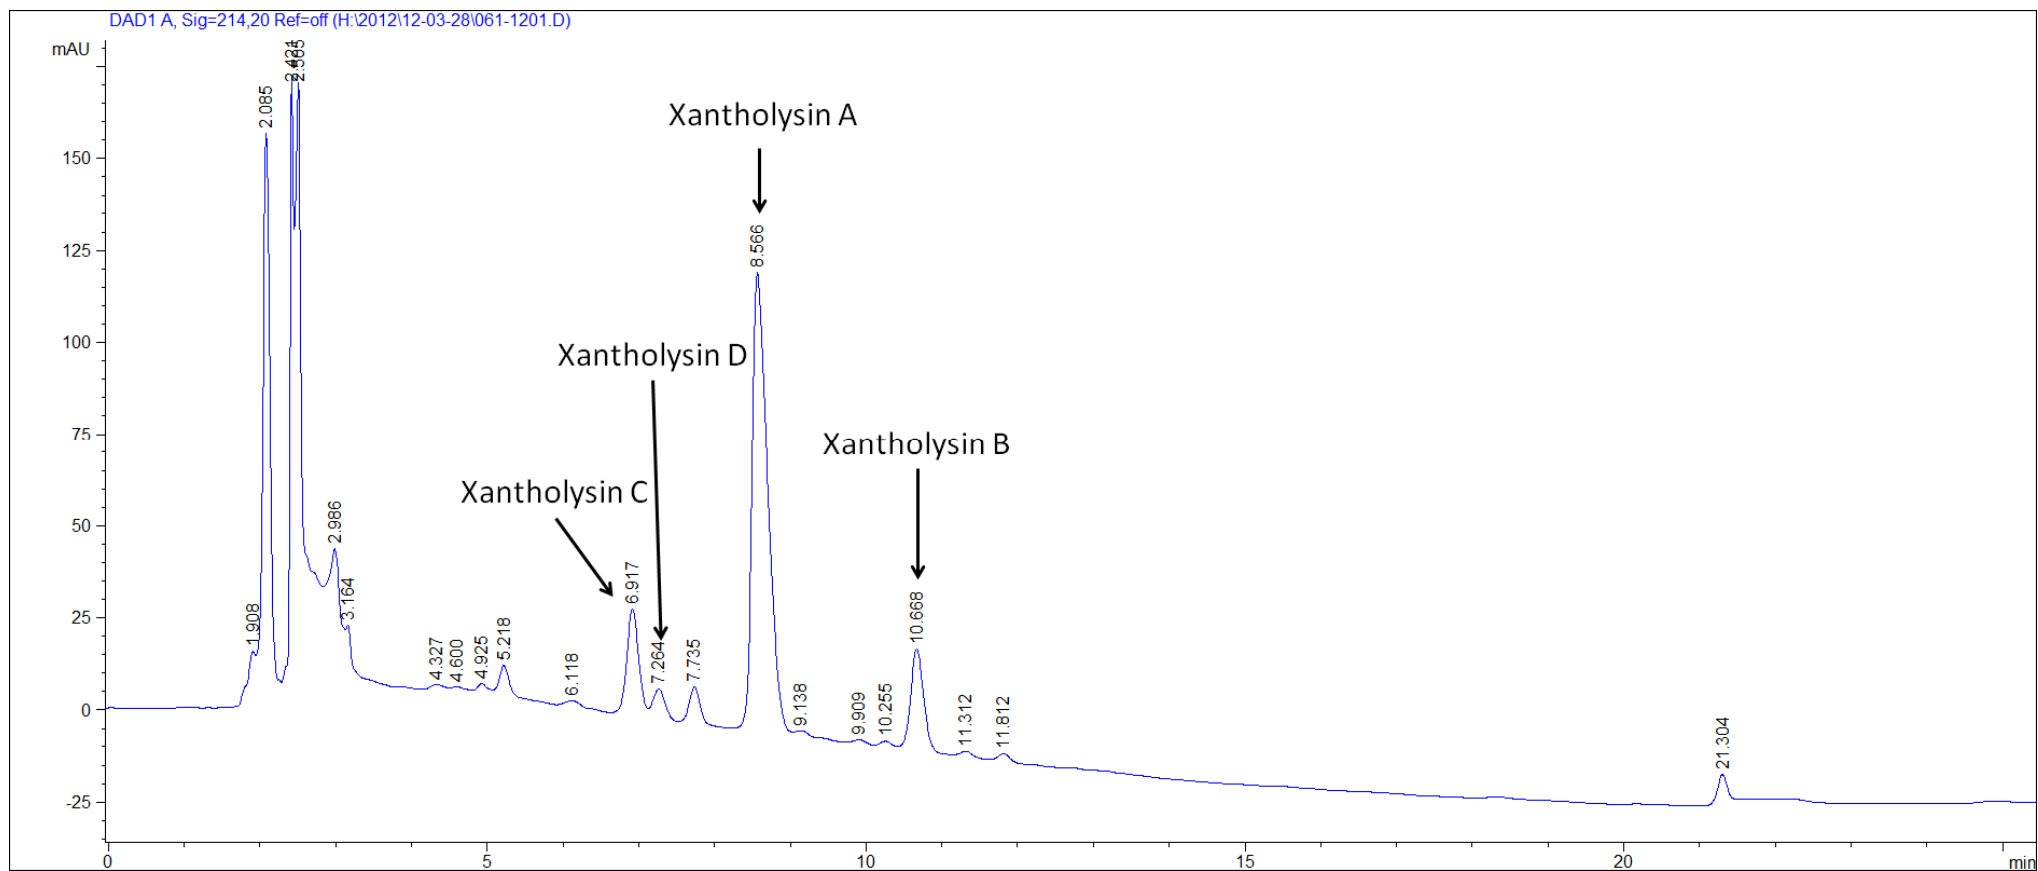

**Figure S6. Chromatographic separation of xantholysin congeners.** LC-MS chromatogram of the extracted mixture prior to purification using UV-detection at 214 nm.
