# Supplementary material for: The Antimicrobial Compound Xantholysin Defines a New Group of Pseudomonas Cyclic Lipopeptides
Source: PubMed Central journal article supplement (PMC3656897; doi:10.1371/journal.pone.0062946), 2013-05-17
Supplement: pone.0062946.s008.pdf [file pone.0062946.s008.pdf]

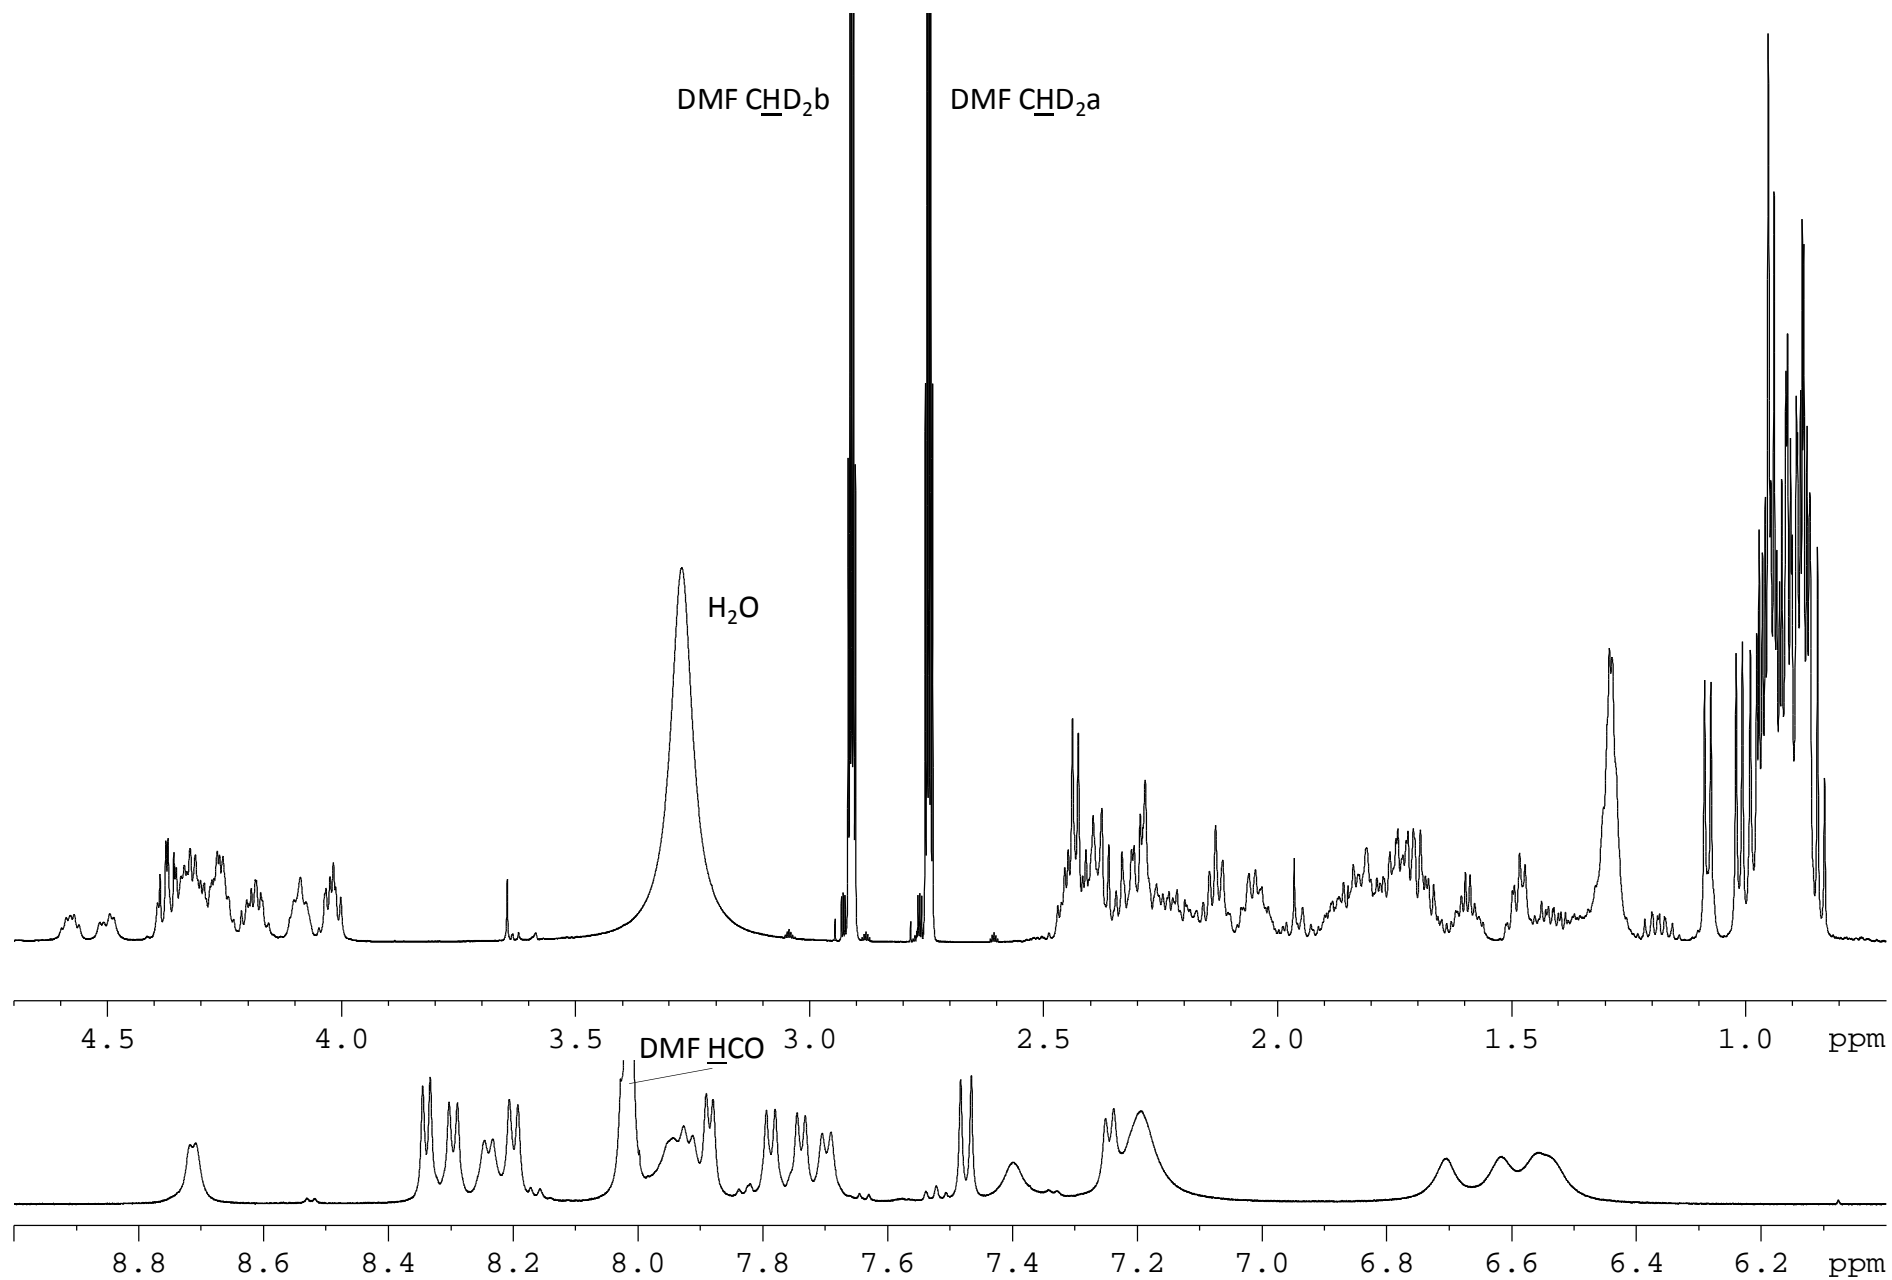

**Figure S8. 1D NMR analysis of xantholysin A.** 1D  $^1\text{H}$  spectrum of xantholysin A in  $\text{DMF-d}_7$  solution,  $55^\circ\text{C}$ , 500 MHz.
