# Supplementary material for: The Antimicrobial Compound Xantholysin Defines a New Group of Pseudomonas Cyclic Lipopeptides
Source: PubMed Central journal article supplement (PMC3656897; doi:10.1371/journal.pone.0062946), 2013-05-17
Supplement: pone.0062946.s009.pdf [file pone.0062946.s009.pdf]

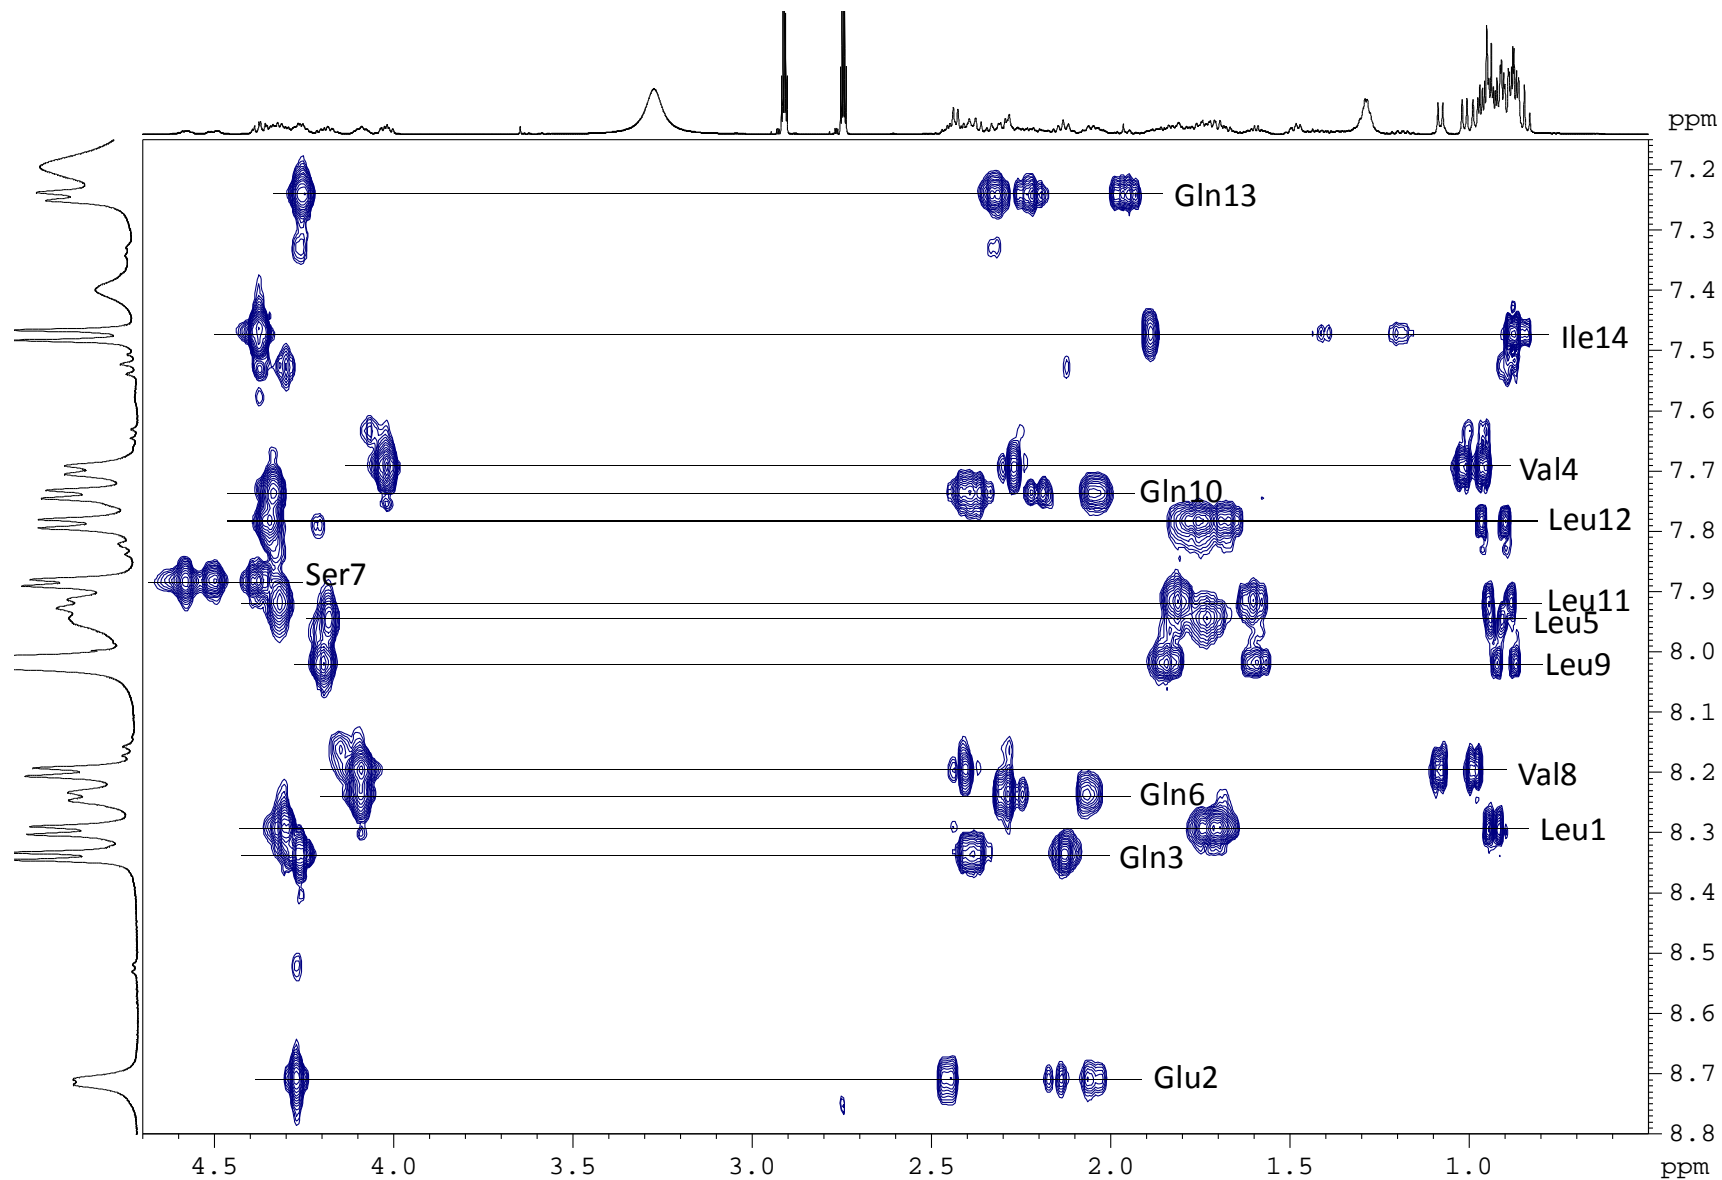

**Figure S9. 2D NMR analysis of xantholysin A.** 2D  $^1\text{H}$ - $^1\text{H}$  TOCSY spectrum of xantholysin A in DMF- $d_7$  solution, 55°C, 500 MHz, revealing the characteristic amino acid spin system patterns.
