# Supplementary material for: The Antimicrobial Compound Xantholysin Defines a New Group of Pseudomonas Cyclic Lipopeptides
Source: PubMed Central journal article supplement (PMC3656897; doi:10.1371/journal.pone.0062946), 2013-05-17
Supplement: pone.0062946.s010.pdf [file pone.0062946.s010.pdf]

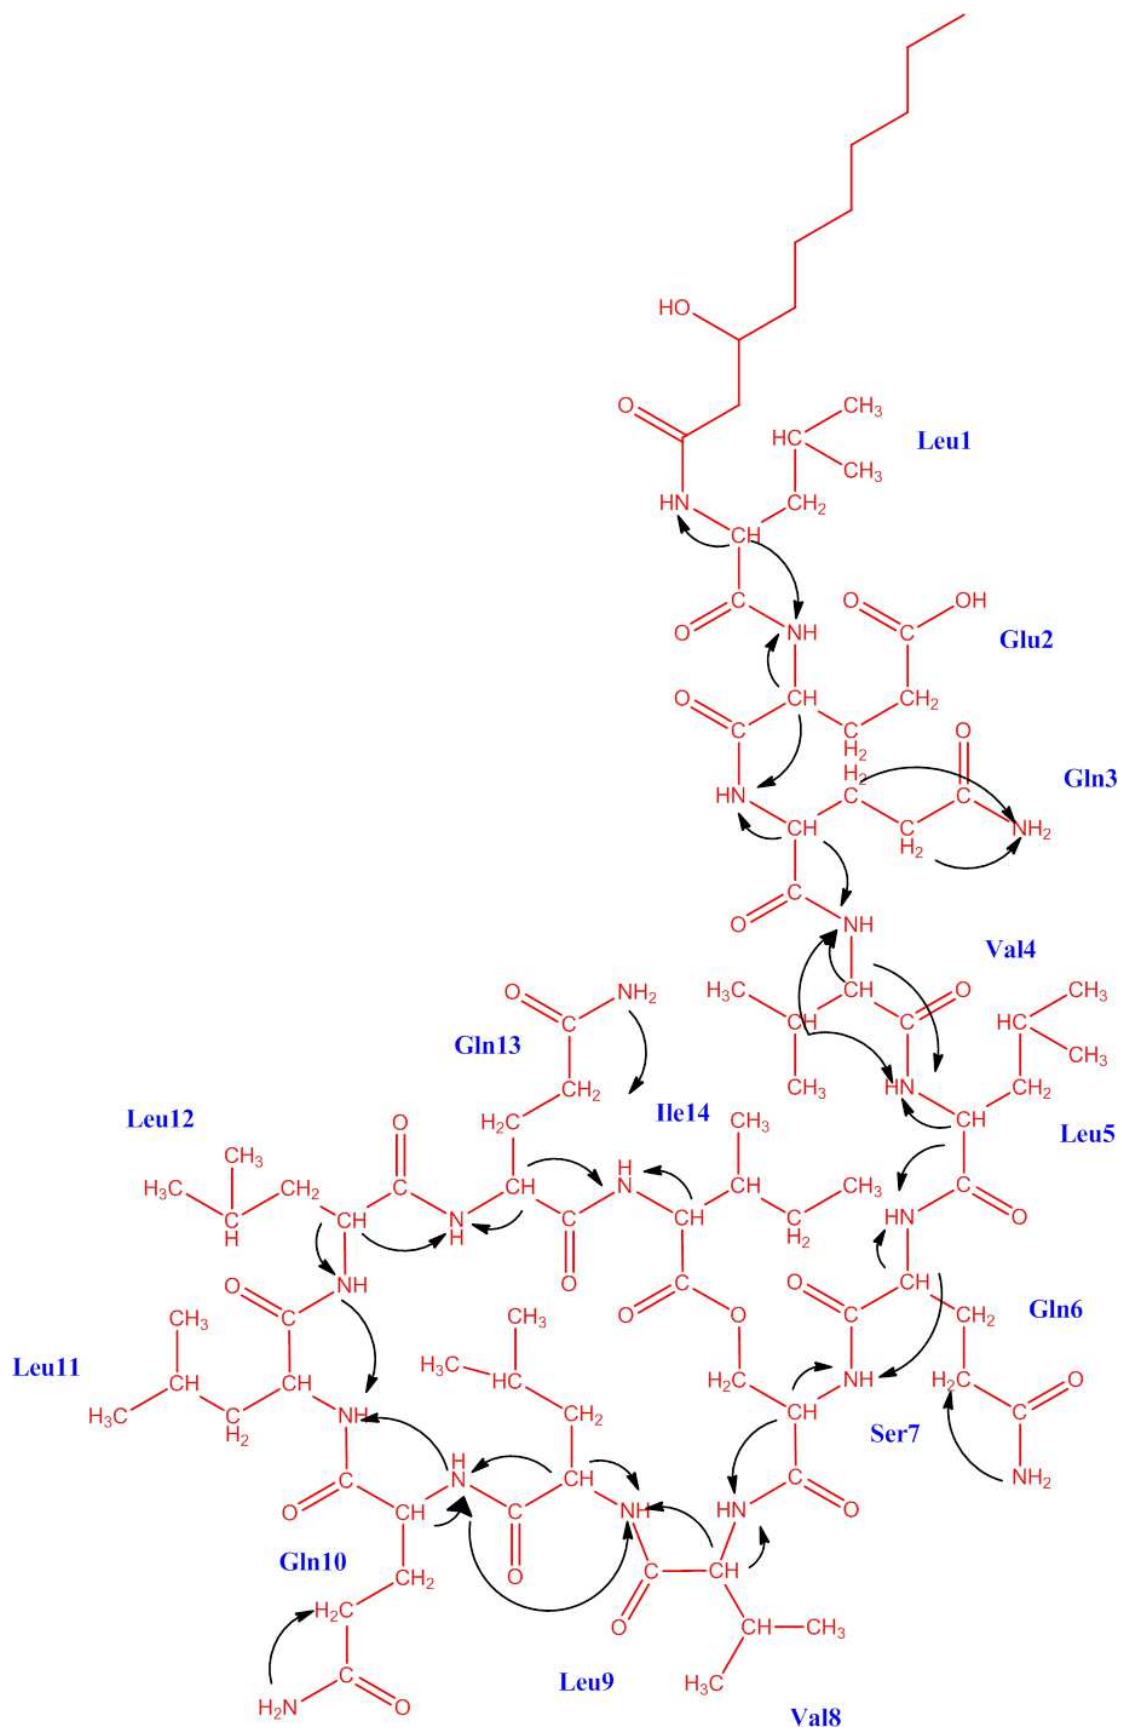

**Figure S10. Nuclear Overhauser effect spectroscopy of xantholysin A.** Established NOE contacts in xantholysin A, observed in a 2D  $^1\text{H}$ - $^1\text{H}$  NOESY spectrum with 300 ms mixing time.
