# Supplementary material for: The Antimicrobial Compound Xantholysin Defines a New Group of Pseudomonas Cyclic Lipopeptides
Source: PubMed Central journal article supplement (PMC3656897; doi:10.1371/journal.pone.0062946), 2013-05-17
Supplement: pone.0062946.s011.pdf [file pone.0062946.s011.pdf]

**A**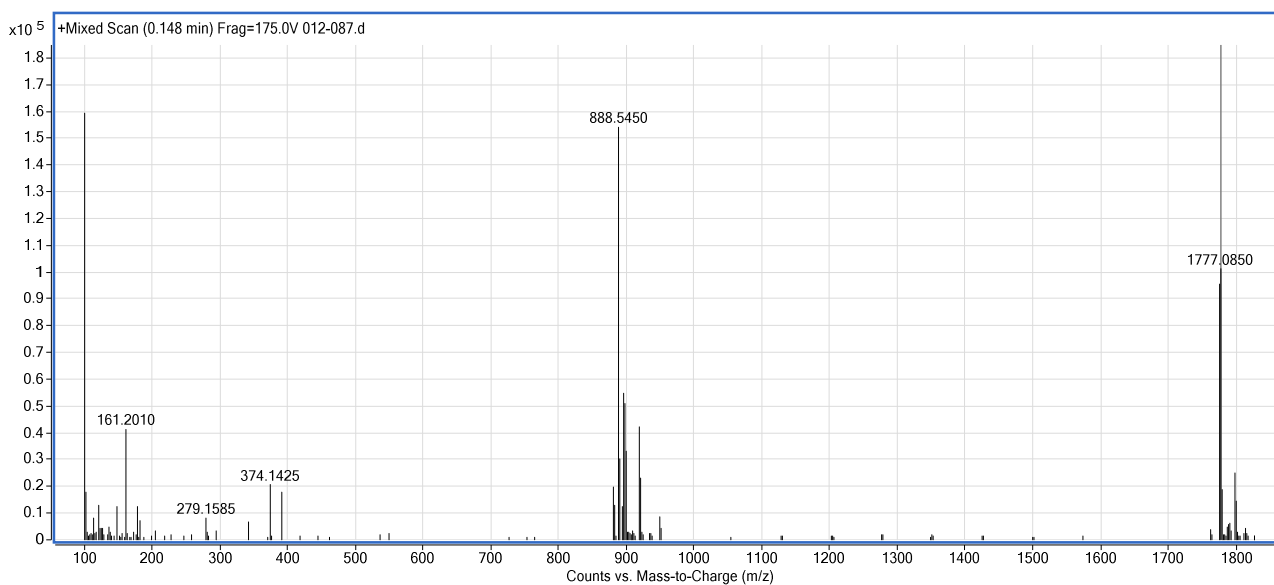**B**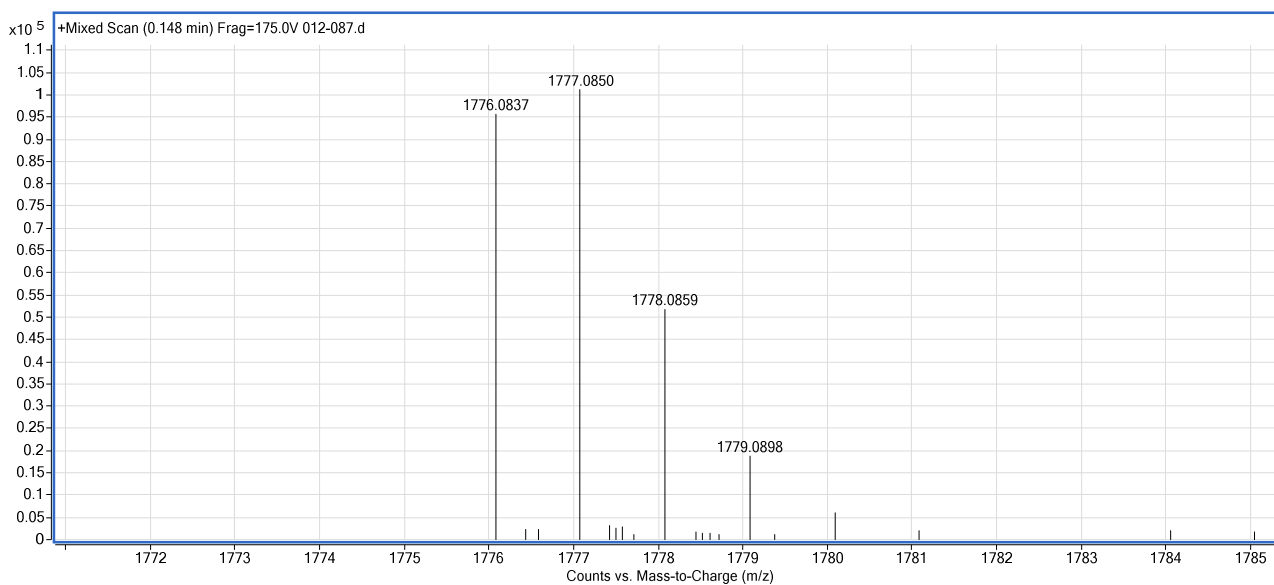

**Figure S11. High resolution mass spectrum of xantholysin A.** (A) Full mass spectrum. (B) Zoom on the [M+H]<sup>+</sup> molecular ion peaks. Expected exact mass of xantholysin A (C<sub>84</sub>H<sub>146</sub>N<sub>18</sub>O<sub>23</sub>) + H<sup>+</sup>: 1776.0881 Da; observed exact mass of xantholysin A + H<sup>+</sup>: 1776.0837 Da.

$$\Delta = \frac{1776.0881 - 1776.0837}{1776.0881} \times 10^6 \text{ ppm} = 2.5 \text{ ppm}$$
