# Supplementary material for: The Antimicrobial Compound Xantholysin Defines a New Group of Pseudomonas Cyclic Lipopeptides
Source: PubMed Central journal article supplement (PMC3656897; doi:10.1371/journal.pone.0062946), 2013-05-17
Supplement: pone.0062946.s012.pdf [file pone.0062946.s012.pdf]

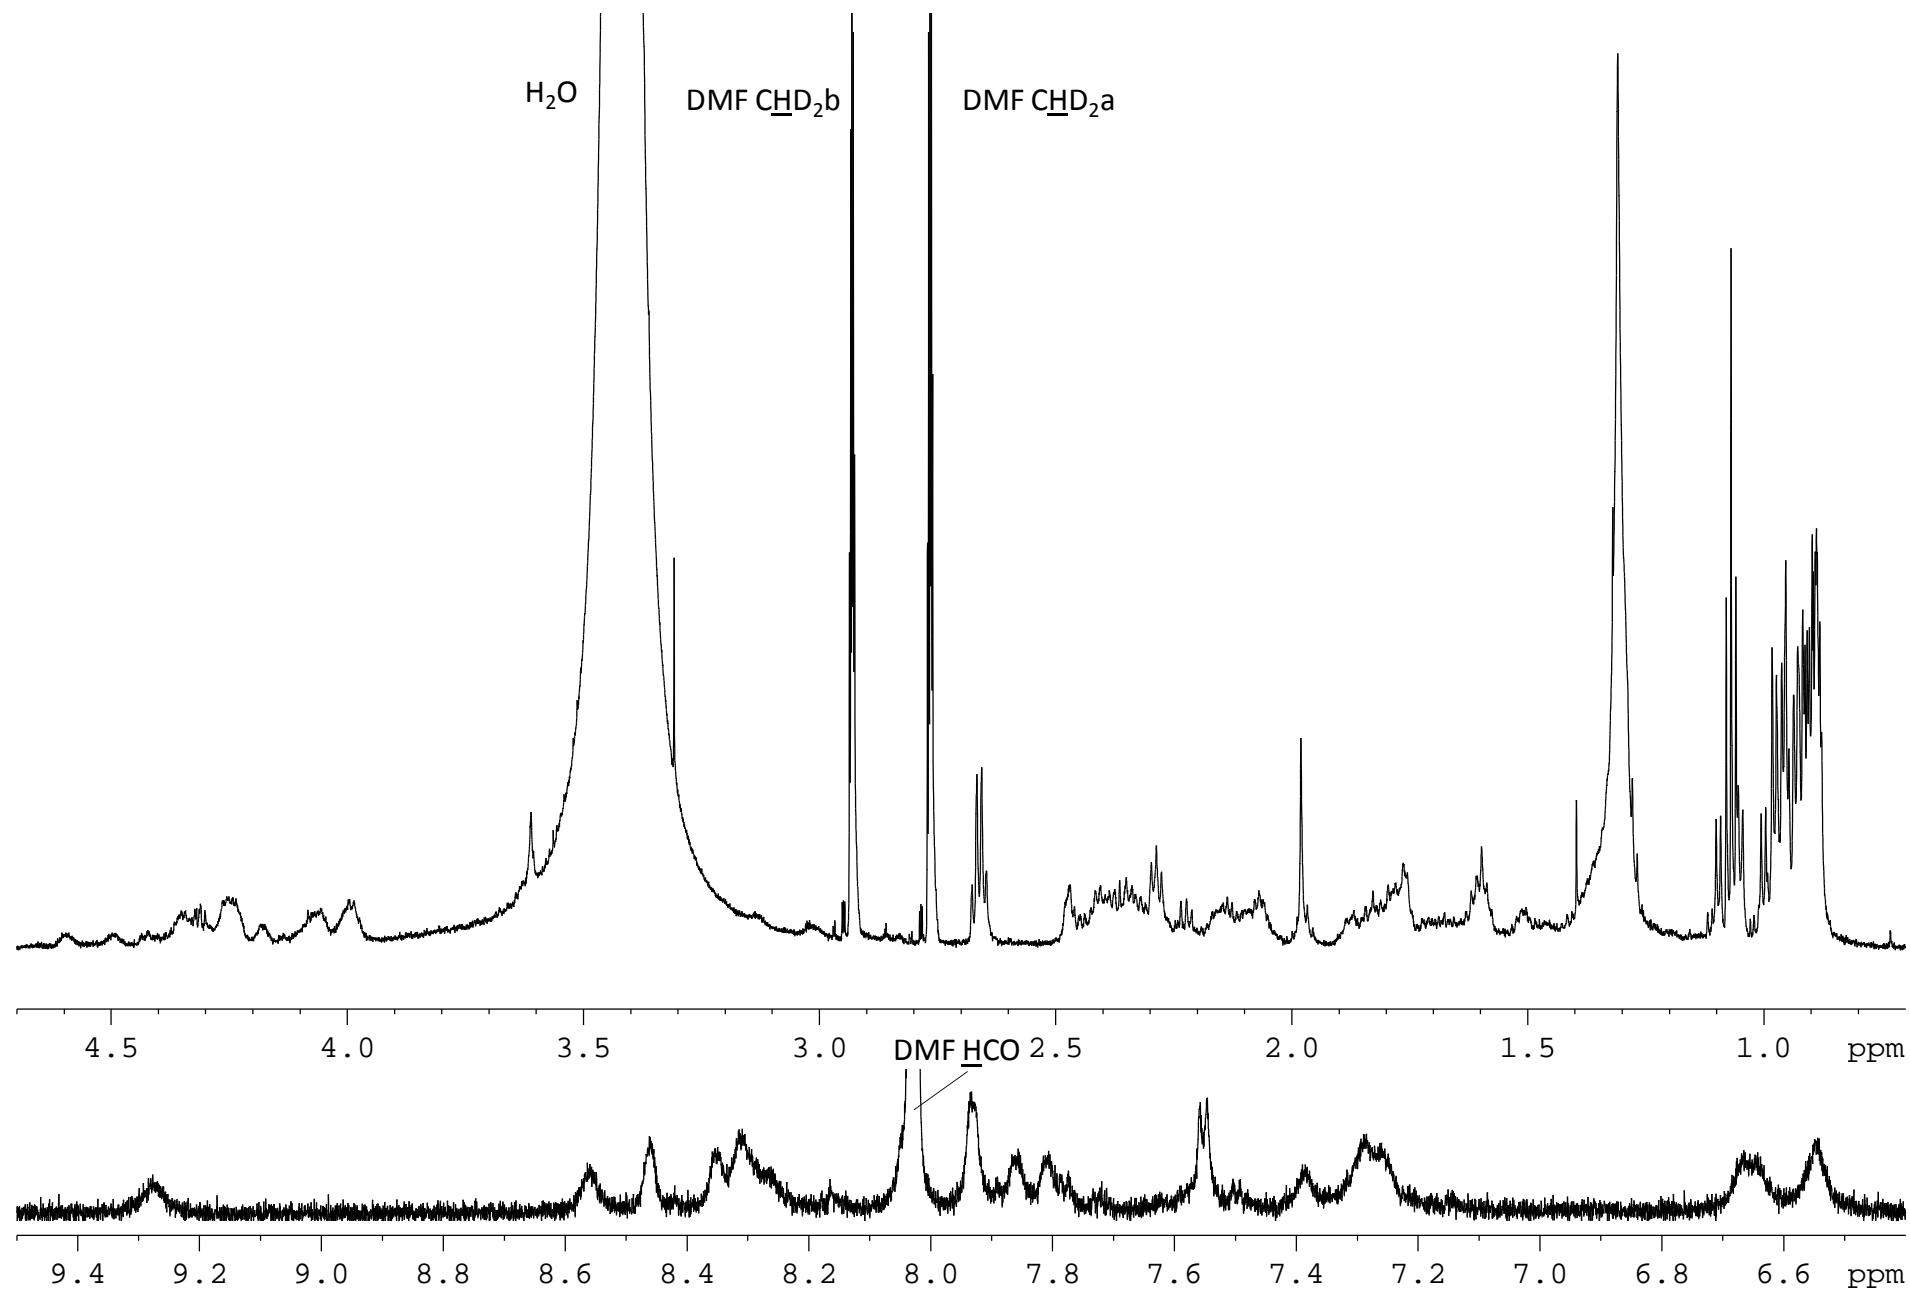

**Figure S12. 1D NMR analysis of xantholysin B.** 1D  $^1\text{H}$  spectrum of xantholysin variant 1, in  $\text{DMF-d}_7$  solution,  $55^\circ\text{C}$ ,  $700\text{ MHz}$ .
