# Supplementary material for: The Antimicrobial Compound Xantholysin Defines a New Group of Pseudomonas Cyclic Lipopeptides
Source: PubMed Central journal article supplement (PMC3656897; doi:10.1371/journal.pone.0062946), 2013-05-17
Supplement: pone.0062946.s013.pdf [file pone.0062946.s013.pdf]

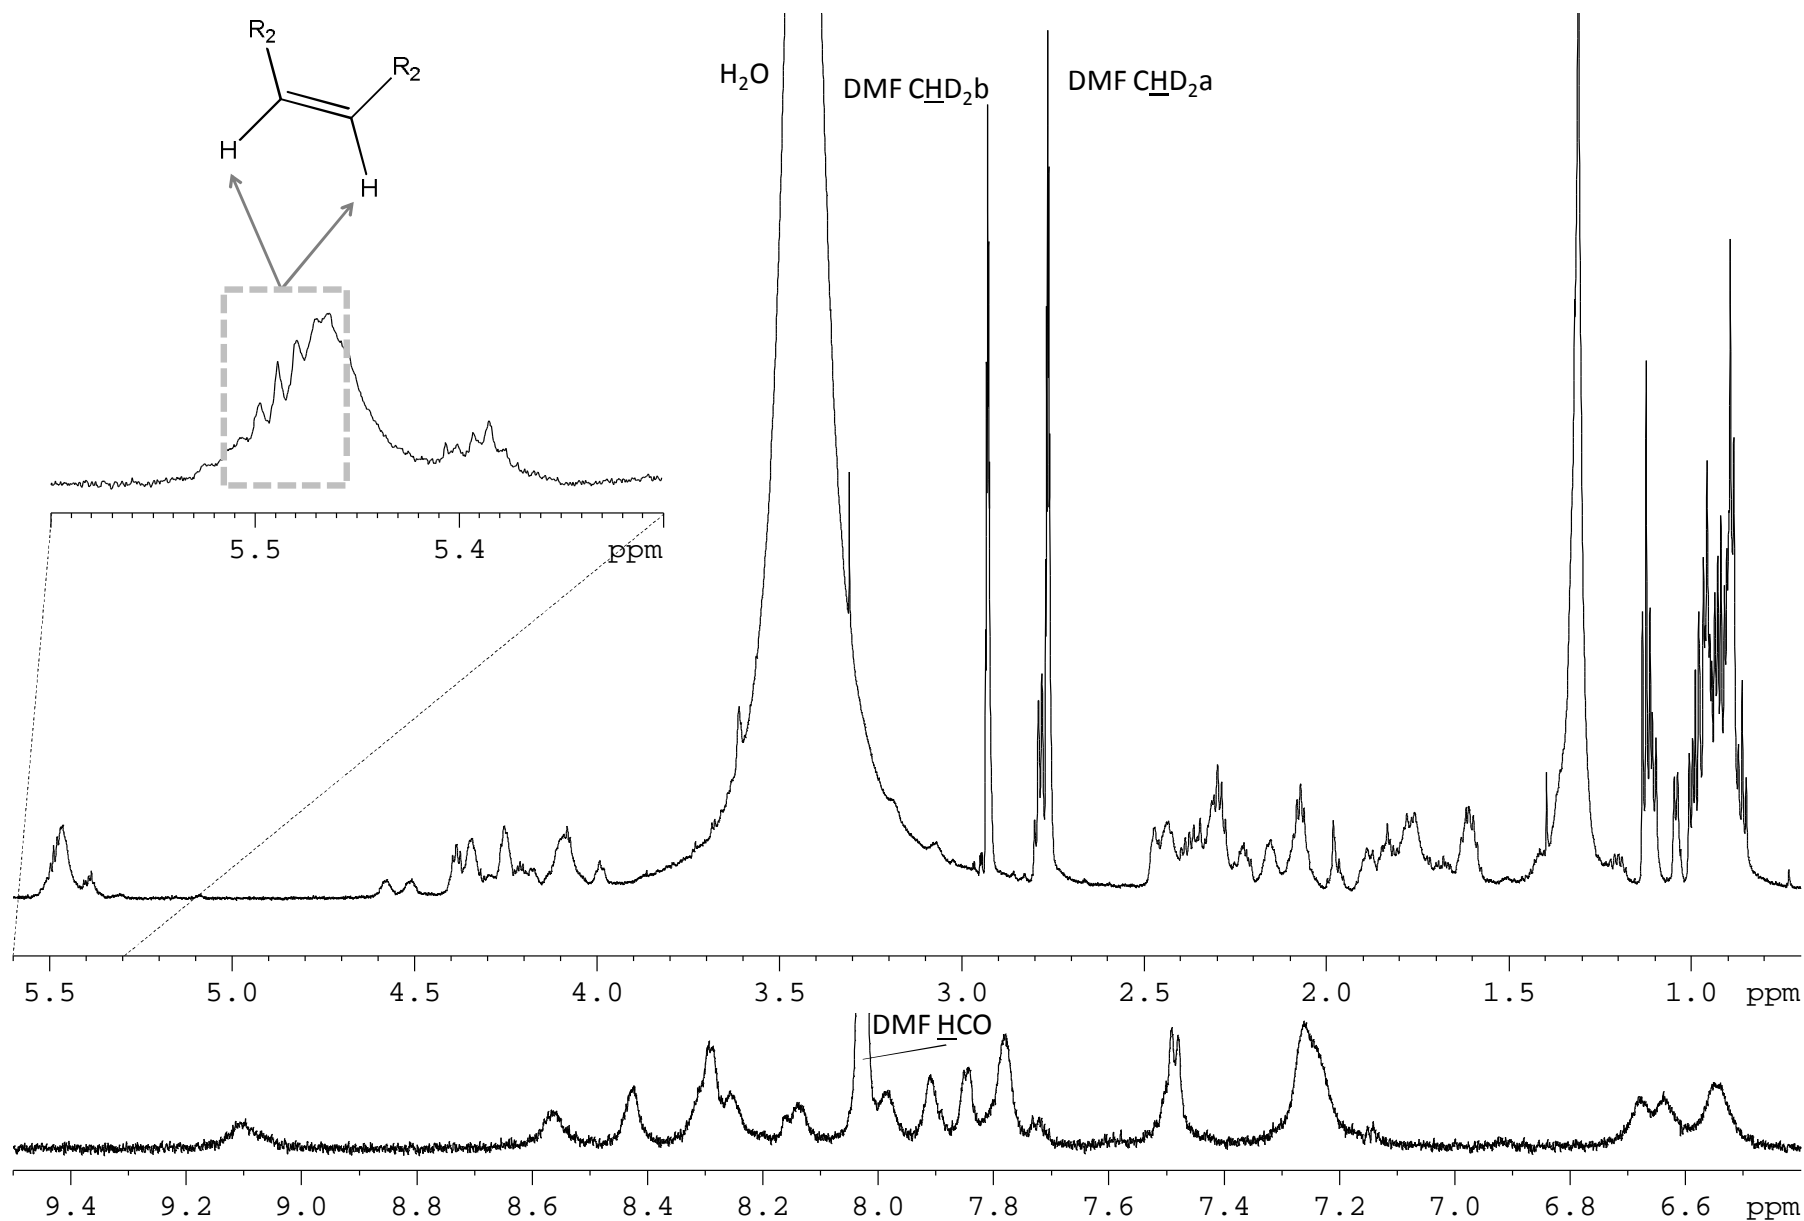

**Figure S13. 1D NMR analysis of xantholysin C.** 1D  $^1\text{H}$  spectrum of xantholysin variant 2, in  $\text{DMF-d}_7$  solution,  $55^\circ\text{C}$ , 700 MHz. The inset shows the signals arising from the alkene protons of the 3-hydroxydodec-5-enoic acid moiety, on top of an unidentified resonance from an impurity.
