# Supplementary material for: The Antimicrobial Compound Xantholysin Defines a New Group of Pseudomonas Cyclic Lipopeptides
Source: PubMed Central journal article supplement (PMC3656897; doi:10.1371/journal.pone.0062946), 2013-05-17
Supplement: pone.0062946.s015.pdf [file pone.0062946.s015.pdf]

**A**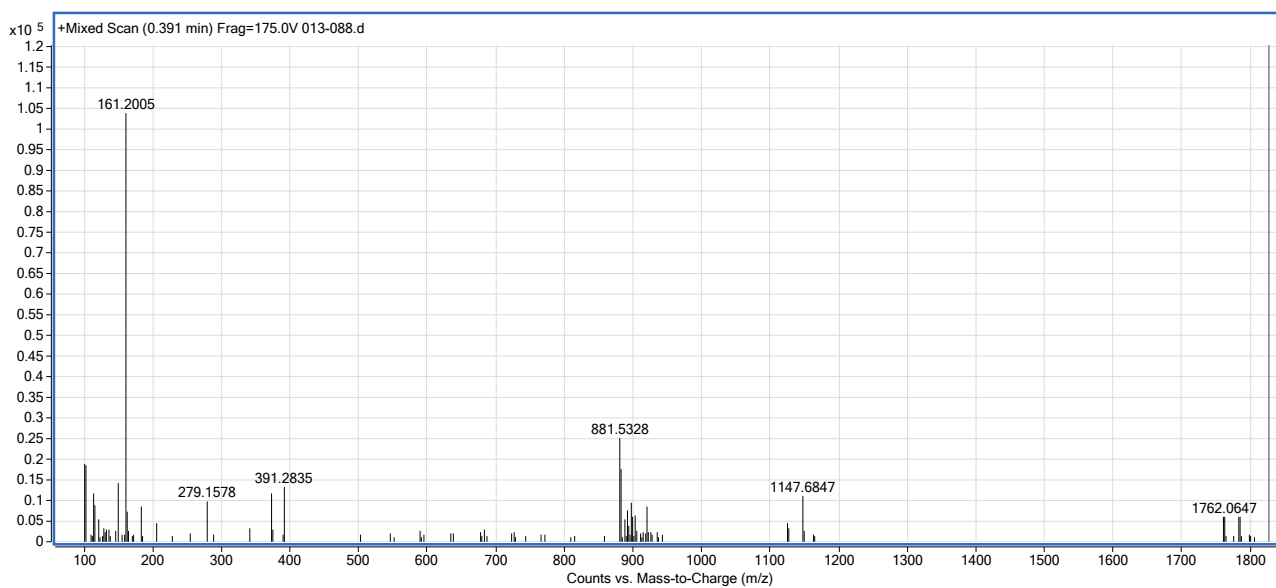**B**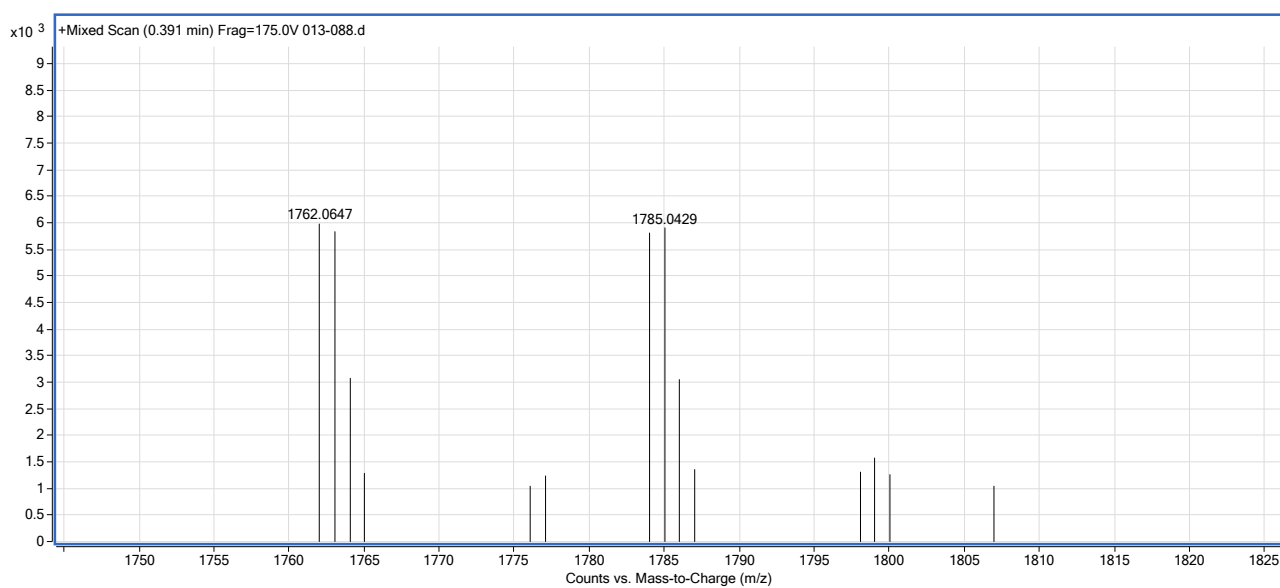

**Figure S15. High resolution mass spectrum of xantholysin B.** (A) Full mass spectrum. (B) Zoom on the  $[M+H]^+$  and  $[M+Na]^+$  molecular ion peaks. Expected exact mass of xantholysin B ( $C_{83}H_{144}N_{18}O_{23}$ ) +  $H^+$ : 1762.0724 Da; observed exact mass of xantholysin B +  $H^+$ : 1762.0647 Da.

$$\Delta = \frac{1762.0724 - 1762.0647}{1762.0724} \times 10^6 \text{ ppm} = 4.4 \text{ ppm}$$
