# Supplementary material for: The Antimicrobial Compound Xantholysin Defines a New Group of Pseudomonas Cyclic Lipopeptides
Source: PubMed Central journal article supplement (PMC3656897; doi:10.1371/journal.pone.0062946), 2013-05-17
Supplement: pone.0062946.s018.pdf [file pone.0062946.s018.pdf]

**Table S1. Characterization of antibacterial activity of *P. putida* BW11M1.** Homology of genes disrupted in *P. putida* BW11M1 plasposon mutants lacking antibacterial activity using *X. alfalfae* subsp. *alfalfae* LMG 497 as indicator strain.

| Mutant                                                                                             | Homology         |              |                                                    |                       |                        |
|----------------------------------------------------------------------------------------------------|------------------|--------------|----------------------------------------------------|-----------------------|------------------------|
|                                                                                                    | Protein name     | Accession nr | Function of gene product                           | Identity <sup>a</sup> | Reference <sup>*</sup> |
| CMPG2178, CMPG2179, CMPG2180, CMPG2181, CMPG2182, CMPG2183, CMPG2184                               | EtIA (PSEEN3332) | YP_608877    | Entolysin synthetase A                             | 75%                   | [1]                    |
| CMPG2185, CMPG2186, CMPG2187, CMPG2188, CMPG2189, CMPG2190, CMPG2191, CMPG2192, CMPG2193, CMPG2194 | EtIB (PSEEN3045) | YP_608606    | Entolysin synthetase B                             | 69%                   | [1]                    |
| CMPG2195, CMPG2196, CMPG2197, CMPG2198, CMPG2199, CMPG2200                                         | EtIC (PSEEN3044) | YP_608605    | Entolysin synthetase C                             | 72%                   | [1]                    |
| CMPG2201                                                                                           | EtIR (PSEEN3335) | YP_608878    | Entolysin transcriptional regulator (LuxR family)  | 75%                   | [1]                    |
| CMPG2202                                                                                           | FahA (PSEEN4611) | YP_610068    | Fumarylacetoacetase (homogentisate catabolism)     | 97%                   | [2]                    |
| CMPG2203                                                                                           | CysG (PSEEN2217) | YP_607840    | Siroheme synthase                                  | 96%                   | [3]                    |
| CMPG2204                                                                                           | RecB (PSEEN0692) | YP_606434    | Exonuclease V, beta subunit                        | 90%                   | [4]                    |
| CMPG2205                                                                                           | ClpB (PSEEN4678) | YP_610130    | ATP-dependent Clp protease, ATP-binding subunit    | 99%                   | [5]                    |
| CMPG2206                                                                                           | PSEEN0141        | YP_605934    | Surface adhesion protein LapA homologue            | 96%                   | [6]                    |
| CMPG2207                                                                                           | PSEEN3459        | YP_608995    | Alginate <i>O</i> -acetylation protein (AlgJ-like) | 84%                   | [7]                    |
| CMPG2208                                                                                           | PA3156           | NP_251846    | LPS <i>N</i> -acetyltransferase WbpD homologue     | 84%                   | [8]                    |
| CMPG2209                                                                                           | PyrE (PSEEN5436) | YP_610831    | Orotate phosphoribosyl-transferase                 | 100%                  | [9]                    |
| CMPG2210                                                                                           | LeuS (PSEEN4813) | YP_610252    | Leucyl-tRNA synthetase                             | 98%                   | [10]                   |
| CMPG2211                                                                                           | PSEEN4860        | YP_610295    | Hypothetical protein                               | 80%                   | [11]                   |

<sup>a</sup> Amino acid sequence identity of the predicted full-length gene product deduced from the corresponding gene identified in the *P. putida* BW11M1 draft genomic sequence (unpublished data). For all mutants genes, highest homology was found for *Pseudomonas entomophila* L48 gene products [12], except for CMPG2208 with a disrupted gene encoding a homologue of *Pseudomonas aeruginosa* PAO1 WbpD.

## \* References

1. Vallet-Gely I, Novikov A, Augusto L, Liehl P, Bolbach G, et al. (2010) Association of hemolytic activity of *Pseudomonas entomophila*, a versatile soil bacterium, with cyclic lipopeptide production. *Appl Environ Microbiol* 76: 910–921.
2. Arias-Barrau E, Olivera ER, Luengo JM, Fernández C, Galán B, et al. (2004) The homogentisate pathway: a central catabolic pathway involved in the degradation of L-phenylalanine, L-tyrosine, and 3-hydroxyphenylacetate in *Pseudomonas putida*. *J Bacteriol* 186: 5062–5077.
3. Warren MJ, Roessner CA, Santander PJ, Scott AI (1990) The *Escherichia coli cysG* gene encodes S-adenosylmethionine-dependent uroporphyrinogen III methylase. *Biochem J* 265: 725–729.
4. Pavankumar TL, Sinha AK, Ray MK (2010) All three subunits of RecBCD enzyme are essential for DNA repair and low-temperature growth in the Antarctic *Pseudomonas syringae* Lz4W. *PLoS One* 5: e9412.
5. Weibezahn J, Tessarz P, Schlieker C, Zahn R, Maglica Z, et al. (2004) Thermotolerance requires refolding of aggregated proteins by substrate translocation through the central pore of ClpB. *Cell* 119: 653–665.
6. Hinsä SM, Espinosa-Urgel M, Ramos JL, O'Toole GA (2003) Transition from reversible to irreversible attachment during biofilm formation by *Pseudomonas fluorescens* WCS365 requires an ABC transporter and a large secreted protein. *Mol Microbiol* 49: 905–918.
7. Franklin MJ, Ohman DE (2002) Mutant analysis and cellular localization of the AlgI, AlgJ, and AlgF proteins required for O acetylation of alginate in *Pseudomonas aeruginosa*. *J Bacteriol* 184: 3000–3007.
8. Wenzel CQ, Daniels C, Keates RAB, Brewer D, Lam JS (2005) Evidence that WbpD is an N-acetyltransferase belonging to the hexapeptide acyltransferase superfamily and an important protein for O-antigen biosynthesis in *Pseudomonas aeruginosa* PAO1. *Mol Microbiol* 57: 1288–1303.
9. Henriksen A, Aghajari N, Jensen KF, Gajhede M (1996) A flexible loop at the dimer interface is a part of the active site of the adjacent monomer of *Escherichia coli* orotate phosphoribosyltransferase. *Biochemistry* 35: 3803–3809.
10. Liu Y, Liao J, Zhu B, Wang E-D, Ding J (2006) Crystal structures of the editing domain of *Escherichia coli* leucyl-tRNA synthetase and its complexes with Met and Ile reveal a lock-and-key mechanism for amino acid discrimination. *Biochem J* 394: 399–407.
11. Demirci H, Gregory ST, Dahlberg AE, Jogle G (2008) Multiple-site trimethylation of ribosomal protein L11 by the PrmA methyltransferase. *Structure* 16: 1059–1066.
12. Vodovar N, Vallenet D, Cruveiller S, Rouy Z, Barbe V, et al. (2006) Complete genome sequence of the entomopathogenic and metabolically versatile soil bacterium *Pseudomonas entomophila*. *Nat Biotechnol* 24: 673–679.
