# Supplementary material for: The Antimicrobial Compound Xantholysin Defines a New Group of Pseudomonas Cyclic Lipopeptides
Source: PubMed Central journal article supplement (PMC3656897; doi:10.1371/journal.pone.0062946), 2013-05-17
Supplement: pone.0062946.s019.pdf [file pone.0062946.s019.pdf]

**Table S2. *In silico* analysis of adenylation domains in xantholysin synthetases.** Predicted substrate specificity of the A domains in the xantholysin NRPSs.

| <b>NRPSpredictor2</b> |               |                                          |                                         |                   |                              |     |
|-----------------------|---------------|------------------------------------------|-----------------------------------------|-------------------|------------------------------|-----|
| <b>Protein</b>        | <b>Domain</b> | <b>Signature</b>                         | <b>Motif</b>                            | <b>AA (score)</b> | <b>Phylotree<sup>a</sup></b> |     |
| XtlA                  | A1            | LWHAFDAMAWEPFLLVG<br>GDINNYGPTTEATVVASA  | DAWFLGNVVK                              | Leu (100%)        | Leu                          |     |
|                       | A2            | LWGAFDGSVWEWKFFCG<br>GGHNVYGPTTEATVDSTA  | DGWKFGVVDK                              | Asp (70%)         | Glu                          |     |
| XtlB                  | A3            | LWATFDASVWEWQFVCG<br>GGHNVYGPTTETTVDCSTV | DAWQVGVDK                               | Gln (70%)         | Gln                          |     |
|                       | A4            | LNNSFDASTLEAWLMVG<br>GDLNGYGPTTEATTFSTT  | DALWGGTFK                               | Val (80%)         | Val                          |     |
|                       | A5            | LWHAFDAMAWEPFLLVG<br>GDVNNYGPTTETTVVATS  | DAWFLGNVVK                              | Leu (100%)        | Leu/Ile                      |     |
|                       | A6            | LWSTFDASVWEWQFVCG<br>GGHNVYGPTTETTVDCSV  | DAWQVGVDK                               | Gln (70%)         | Gln                          |     |
|                       | A7            | RWMTFDVSVWEWHFLCS<br>GEHNLYGPTTEAAVDVSA  | DVWHLVVDK                               | Ser (80%)         | Ser                          |     |
|                       | A8            | LNNSFDASTLEAWLMVG<br>GDLNGYGPTTEATTFSTT  | DALWGGTFK                               | Val (80%)         | Val                          |     |
|                       | A9            | LWHAFDAMAWEPFLLVG<br>GDVNNYGPTTETTVVATS  | DAWFLGNVVK                              | Leu (100%)        | Leu/Ile                      |     |
|                       | A10           | LWSTFDASVWEWQFVCG<br>GGHNVYGPTTETTVDCSV  | DAWQVGVDK                               | Gln (70%)         | Gln                          |     |
|                       | XtlC          | A11                                      | LWHAFDAMAWEPFLLIG<br>GDVNNYGPTTETTVVASS | DAWFLGNVVK        | Leu (100%)                   | Leu |
|                       |               | A12                                      | LWHAFDAMAWEPFLLIG<br>GDVNNYGPTTEATVVATS | DAWFLGNVVK        | Leu (100%)                   | Leu |
| A13                   |               | LWSTFDASVWEWQFVCG<br>GGHNVYGPTTEATVDCSV  | DAWQVGVDK                               | Gln (70%)         | Gln                          |     |
| A14                   |               | LNNSFDAATLDGFVLCG<br>GEVHCYGPTEATTFATA   | DALFLGCTFK                              | Leu (70%)         | Ile/Val/Leu                  |     |

<sup>a</sup> Deduced from A domain clustering in Fig. 3
