# Supplementary material for: The Antimicrobial Compound Xantholysin Defines a New Group of Pseudomonas Cyclic Lipopeptides
Source: PubMed Central journal article supplement (PMC3656897; doi:10.1371/journal.pone.0062946), 2013-05-17
Supplement: pone.0062946.s020.pdf [file pone.0062946.s020.pdf]

**Table S3. Antagonistic activity spectrum of *P. putida* BW11M1 wild type (WT) and xantholysin-deficient mutants.** The indicators shown are listed in Table 1 and Table S4. All other bacteria listed in Table S4 are not inhibited by strain BW11M1. Antagonism was semi-quantified by measuring the halo radii (in mm; average of three repeats; ND, no halo detected). Values in parentheses denote formation of a turbid halo. For some wild-type *Xanthomonas* strains a larger turbid halo was observed around a smaller clear halo. Additional italicized values in parentheses refer to the presence of a ‘secondary’ turbid growth inhibition halo.

| Strain                                                     | WT     | <i>xtlA</i> | <i>xtlB</i> | <i>xtlC</i> | <i>xtlR</i> |
|------------------------------------------------------------|--------|-------------|-------------|-------------|-------------|
| <b><math>\alpha</math>-Proteobacteria</b>                  |        |             |             |             |             |
| <i>Azospirillum brasilense</i> Sp7                         | (5.0)  | (3.0)       | (3.0)       | (3.0)       | (3.0)       |
| <i>Sphingomonas wittichii</i> RW1                          | 9.5    | 4.0         | 4.0         | 4.0         | 4.0         |
| <b><math>\beta</math>-Proteobacteria</b>                   |        |             |             |             |             |
| <i>Burkholderia vietnamensis</i> LMG 10927                 | 3.5    | ND          | ND          | ND          | ND          |
| <i>Variovorax paradoxus</i> LMG 1797                       | 11.0   | 5.5         | 5.0         | 5.5         | 5.5         |
| <b><math>\gamma</math>-Proteobacteria</b>                  |        |             |             |             |             |
| <i>Aeromonas hydrophilia</i> ATCC 7966                     | 4.5    | ND          | ND          | ND          | ND          |
| <i>Erwinia amylovora</i> CFBP 1430                         | (4.5)  | ND          | ND          | ND          | ND          |
| <i>Xanthomonas alfalfae</i> subsp. <i>alfalfae</i> LMG 497 | 2.5    | ND          | ND          | ND          | ND          |
| <i>X. axonopodis</i> pv. <i>manihotis</i> LMG 784          | 3.0    | ND          | ND          | ND          | ND          |
| <i>X. campestris</i> pv. <i>campestris</i> LMG 582         | 1.0    | ND          | ND          | ND          | ND          |
| <i>X. citri</i> pv. <i>malvacearum</i> LMG 761             | 1.5    | ND          | ND          | ND          | ND          |
| <i>X. hortorum</i> pv. <i>hederae</i> LMG 7411             | 11.5   | 8.5         | 8.0         | 8.5         | 8.5         |
| <i>X. sacchari</i> LMG 471                                 | 3.5    | ND          | ND          | ND          | ND          |
|                                                            | (12.5) | (9.0)       | (9.5)       | (9.0)       | (9.5)       |
| <i>X. translucens</i> LMG 12921                            | 1.5    | ND          | ND          | ND          | ND          |
| <i>X. translucens</i> pv. <i>cerealis</i> LMG 679          | 3.0    | ND          | ND          | ND          | ND          |
|                                                            | (15.0) | (10.0)      | (9.5)       | (10.0)      | (10.0)      |
| <i>X. translucens</i> pv. <i>graminis</i> LMG 726          | (13.5) | (10.0)      | (9.5)       | (10.0)      | (9.5)       |
| <i>X. translucens</i> pv. <i>hordei</i> LMG 737            | 10.5   | 7.5         | 8.0         | 7.5         | 7.5         |
| <i>X. vasicola</i> pv. <i>holcicola</i> LMG 736            | 8.5    | 5.0         | 5.5         | 5.0         | 5.5         |
| <i>X. vasicola</i> pv. <i>musacearum</i> LMG 785           | 3.0    | ND          | ND          | ND          | ND          |
|                                                            | (28.5) | (18.5)      | (18.5)      | (18.5)      | (18.5)      |
| <i>X. vasicola</i> pv. <i>musacearum</i> LMG 7431          | 2.5    | ND          | ND          | ND          | ND          |
|                                                            | (24.0) | (17.0)      | (17.5)      | (17.0)      | (17.0)      |
| <i>Xanthomonas</i> sp. pv. <i>zinnia</i> LMG 8692          | 3.0    | ND          | ND          | ND          | ND          |
| <b>Actinobacteria</b>                                      |        |             |             |             |             |
| <i>Mycobacterium smegmatis</i> DSM 43756                   | 6.0    | 3.5         | 3.5         | 3.5         | 4.0         |
| <i>Rhodococcus erythropolis</i> N11                        | 4.0    | 2.0         | 1.5         | 1.5         | 1.5         |
| <i>Streptomyces coelicolor</i> A3(2)                       | 6.0    | 2.5         | 2.0         | 2.0         | 2.5         |
| <i>Streptomyces lividans</i> TK24                          | 6.5    | 3.0         | 3.0         | 3.0         | 3.0         |
| <b>Firmicutes</b>                                          |        |             |             |             |             |
| <i>Bacillus megaterium</i> ATCC 13632                      | 19.0   | 9.0         | 8.5         | 8.0         | 8.5         |
| <i>Bacillus subtilis</i> LMG 7135                          | 7.5    | 5.0         | 5.0         | 4.5         | 4.5         |
| <i>Staphylococcus aureus</i> ATCC 6358                     | 9.5    | 5.0         | 5.0         | 5.0         | 5.0         |
