# Supplementary material for: The Antimicrobial Compound Xantholysin Defines a New Group of Pseudomonas Cyclic Lipopeptides
Source: PubMed Central journal article supplement (PMC3656897; doi:10.1371/journal.pone.0062946), 2013-05-17
Supplement: pone.0062946.s021.pdf [file pone.0062946.s021.pdf]

**Table S4. Analysis of bacterial susceptibility to *P. putida* BW11M1.** List of non-*Xanthomonas* bacteria used as indicators.

| Bacterial strain                             | Source or reference* |
|----------------------------------------------|----------------------|
| <b>Gram-negative bacteria</b>                |                      |
| <b><math>\alpha</math>-Proteobacteria</b>    |                      |
| <i>Agrobacterium tumefaciens</i> A208        | [1]                  |
| <i>Azospirillum brasilense</i> Sp7           | [2]                  |
| <i>Sphingomonas wittichii</i> RW1            | [3]                  |
| <b><math>\beta</math>-Proteobacteria</b>     |                      |
| <i>Bordetella avium</i> 197N                 | [4]                  |
| <i>Burkholderia cepacia</i> LMG 1222         | BCCM <sup>a</sup>    |
| <i>Burkholderia vietnamiensis</i> LMG 10927  | BCCM                 |
| <i>Variovorax paradoxus</i> LMG 1797         | BCCM                 |
| <b><math>\gamma</math>-Proteobacteria</b>    |                      |
| <i>Aeromonas hydrophila</i> ATCC 7966        | ATCC <sup>b</sup>    |
| <i>Citrobacter freundii</i> ATCC 8090        | ATCC                 |
| <i>Enterobacter aerogenes</i> ATCC 13048     | ATCC                 |
| <i>Erwinia amylovora</i> CFBP 1430           | CFBP <sup>c</sup>    |
| <i>Klebsiella pneumoniae</i> ATCC 13883      | ATCC                 |
| <i>Proteus vulgaris</i> LMM 2011             | LMM <sup>d</sup>     |
| <i>Salmonella enteritidis</i> ATCC 13076     | ATCC                 |
| <i>Serratia entomophila</i> DSM 12358        | DSMZ <sup>e</sup>    |
| <i>Shigella flexneri</i> LMG 10472           | BCCM                 |
| <i>Yersinia enterocolitica</i> LMG 7899      | BCCM                 |
| <b>Gram-positive bacteria</b>                |                      |
| <b>Firmicutes</b>                            |                      |
| <i>Lactobacillus plantarum</i> LMG-P21295    | [5]                  |
| <i>Lactobacillus rhamnosus</i> GG (LMG 6400) | BCCM                 |
| <i>Bacillus megaterium</i> ATCC 13632        | ATCC                 |
| <i>Bacillus subtilis</i> LMG 7135            | BCCM                 |
| <i>Staphylococcus aureus</i> ATCC 6358       | ATCC                 |
| <b>Actinobacteria</b>                        |                      |
| <i>Rhodococcus erythropolis</i> N11          | [6]                  |
| <i>Mycobacterium smegmatis</i> DSM 43756     | DSMZ                 |
| <i>Streptomyces coelicolor</i> A3(2)         | DSMZ                 |
| <i>Streptomyces lividans</i> TK24            | [7]                  |

<sup>a</sup> BCCM, Belgian Coordinated Collections of Microorganisms

<sup>b</sup> ATCC, American Type Culture Collection

<sup>c</sup> CFBP: French Collection of Plant-associated Bacteria

<sup>d</sup> LMM: Laboratory of Food Microbiology, KU Leuven

<sup>e</sup> DSMZ: Leibniz Institute DSMZ-German Collection of Microorganisms and Cell Cultures

## \* References

1. Wirawan IG, Kang HW, Kojima M (1993) Isolation and characterization of a new chromosomal virulence gene of *Agrobacterium tumefaciens*. *J Bacteriol* 175: 3208–3212.
2. De Mot R, Vanderleyden J (1989) Application of two-dimensional protein analysis for strain fingerprinting and mutant analysis of *Azospirillum* species. *Can J Microbiol* 35: 960–967.
3. Miller TR, Delcher AL, Salzberg SL, Saunders E, Detter JC, et al. (2010) Genome sequence of the dioxin-mineralizing bacterium *Sphingomonas wittichii* RW1. *J Bacteriol* 192: 6101–6102.
4. Sebahia M, Preston A, Maskell DJ, Kuzmiak H, Connell TD, et al. (2006) Comparison of the genome sequence of the poultry pathogen *Bordetella avium* with those of *B. bronchiseptica*, *B. pertussis*, and *B. parapertussis* reveals extensive diversity in surface structures associated with host interaction. *J Bacteriol* 188: 6002–6015.
5. Ström K, Sjögren J, Broberg A, Schnürer J (2002) *Lactobacillus plantarum* MiLAB 393 produces the antifungal cyclic dipeptides cyclo(L-Phe-L-Pro) and cyclo(L-Phe-trans-4-OH-L-Pro) and 3-phenyllactic acid. *Appl Environ Microbiol* 68: 4322–4327.
6. Nagy I, Compernelle F, Ghys K, Vanderleyden J, De Mot R (1995) A single cytochrome P-450 system is involved in degradation of the herbicides EPTC (*S*-ethyl dipropylthiocarbamate) and atrazine by *Rhodococcus* sp. strain NI86/21. *Appl Environ Microbiol* 61: 2056–2060.
7. Simonet JM, Bocard F, Pernodet JL, Gagnat J, Guérineau M (1987) Excision and integration of a self-transmissible replicon of *Streptomyces ambofaciens*. *Gene* 59: 137–144.
