# Supplementary material for: The Antimicrobial Compound Xantholysin Defines a New Group of Pseudomonas Cyclic Lipopeptides
Source: PubMed Central journal article supplement (PMC3656897; doi:10.1371/journal.pone.0062946), 2013-05-17
Supplement: pone.0062946.s022.pdf [file pone.0062946.s022.pdf]

**Table S5. Antifungal activity of *P. putida* BW11M1 and xantholysin-deficient mutants.** The effect on mycelial growth near a bacterial colony is indicated: (+) inhibition by wild type; (↓) or (-), reduced or no inhibition by *xtl* mutants compared to WT (as observed on PTA medium). For a particular indicator, the same phenotype was observed for the *xtlA*, *xtlB*, *xtlC* and *xtlR* mutants (CMPG2183, CMPG2187, CMPG2198, and CMPG2201, respectively), collectively designated *xtl* mutants. The inhibitory patterns for selected fungal strains are shown in Fig. S5.

| Fungal strain                                                        | Growth inhibition |                    |
|----------------------------------------------------------------------|-------------------|--------------------|
|                                                                      | Wild type         | <i>xtl</i> mutants |
| <i>Alternaria longipes</i> CBS 620.83                                | +                 | -                  |
| <i>Alternaria porri</i> (CMPG collection)                            | +                 | NT <sup>a</sup>    |
| <i>Ascochyta pisi</i> MUCL30164                                      | +                 | ↓                  |
| <i>Aspergillus flavus</i> CBS111.45                                  | +                 | -                  |
| <i>Botrytis cinerea</i> JHCC8973                                     | +                 | -                  |
| <i>Botrytis cinerea</i> MUCL30158                                    | +                 | -                  |
| <i>Colletotrichum gloeosporoides</i> SR24                            | +                 | ↓                  |
| <i>Fusarium culmorum</i> MUCL30162                                   | +                 | -                  |
| <i>Fusarium graminearum</i> MUCL30161                                | +                 | -                  |
| <i>Fusarium oxysporum</i> MUCL909                                    | +                 | -                  |
| <i>Fusarium oxysporum</i> MUCL30160                                  | +                 | -                  |
| <i>Fusarium oxysporum</i> f. sp. <i>radicis-lycopersi</i> CBS 873.95 | +                 | -                  |
| <i>Fusarium oxysporum</i> f. sp. <i>vasinfectum</i> CBS 410.90       | +                 | -                  |
| <i>Gloeosporium musarum</i> MUCL500                                  | +                 | -                  |
| <i>Gloeosporium solani</i> CBS 194.32                                | +                 | -                  |
| <i>Nectria haematococca</i> MUCL20259                                | +                 | -                  |
| <i>Neurospora crassa</i> (CMPG collection)                           | +                 | -                  |
| <i>Penicillium expansum</i> (CMPG collection)                        | +                 | -                  |
| <i>Pyricularia oryzae</i> (CMPG collection)                          | +                 | ↓                  |
| <i>Pyrenophora tritici-repentis</i> MUCL30217                        | +                 | ↓                  |
| <i>Rhizoctonia solani</i> CBS 211.84                                 | +                 | -                  |
| <i>Rhizoctonia solani</i> NL84                                       | +                 | NT                 |
| <i>Septoria nodorum</i> MUCL30111                                    | +                 | -                  |
| <i>Trichoderma viride</i> MUCL29726                                  | +                 | -                  |
| <i>Verticillium albo-atrum</i> MUCL19212                             | +                 | -                  |
| <i>Verticillium dahliae</i> MUCL 19210                               | +                 | -                  |

<sup>a</sup> Not tested
