# Supplementary material for: The Antimicrobial Compound Xantholysin Defines a New Group of Pseudomonas Cyclic Lipopeptides
Source: PubMed Central journal article supplement (PMC3656897; doi:10.1371/journal.pone.0062946), 2013-05-17
Supplement: pone.0062946.s023.pdf [file pone.0062946.s023.pdf]

**Table S6. NMR analysis of xantholysin A.**  $^1\text{H}$  and  $^{13}\text{C}$  NMR assignment of xantholysin A in DMF-d7 solution, 55°C.

|                         |                               | $^1\text{H}$ $\delta$ [ppm] | $^{13}\text{C}$ $\delta$ [ppm] |                    |                               | $^1\text{H}$ $\delta$ [ppm] | $^{13}\text{C}$ $\delta$ [ppm] |           |        |
|-------------------------|-------------------------------|-----------------------------|--------------------------------|--------------------|-------------------------------|-----------------------------|--------------------------------|-----------|--------|
| <b><u>HDA</u></b>       | CO                            |                             | 173.28                         | <b><u>Gln3</u></b> |                               |                             |                                |           |        |
|                         | CH <sub>2</sub> $\alpha$      | 2.43                        | 44.11                          |                    | $^3J_{\text{HNH}\alpha}$ [Hz] | 6.14                        | NH                             | 8.34      |        |
|                         | CH $\beta$                    | 4.02                        | 68.71                          |                    |                               |                             | CH $\alpha$                    | 4.26      | 55.64  |
|                         | CH <sub>2</sub> $\gamma$      | 1.48                        | 37.91                          |                    |                               |                             | CO                             |           | n.a.   |
|                         | CH <sub>2</sub> $\delta$ 1    | 1.36                        | 25.76                          |                    |                               |                             | CH <sub>2</sub> $\beta$        | 2.13      | 27.17  |
|                         | CH <sub>2</sub> $\delta$ 2    | 1.48                        | 25.76                          |                    |                               |                             | CH <sub>2</sub> $\gamma$       | 2.38      | 32.38  |
|                         | CH <sub>2</sub> $\epsilon$    | 1.31                        | 29.97                          |                    |                               |                             | CO $\delta$                    |           | n.a.   |
|                         | CH <sub>2</sub> $\zeta$       | 1.28                        | 29.60                          |                    |                               |                             | NH <sub>2</sub>                | 6.71/7.40 |        |
|                         | CH <sub>2</sub> $\eta$        | 1.28                        | 32.07                          |                    |                               |                             |                                |           |        |
|                         | CH <sub>2</sub> $\theta$      | 1.28                        | 22.72                          |                    |                               |                             |                                |           |        |
| CH <sub>3</sub> $\iota$ | 0.88                          | 13.91                       |                                |                    |                               |                             |                                |           |        |
|                         | OH                            | n.a.                        |                                |                    |                               |                             |                                |           |        |
| <b><u>Leu1</u></b>      |                               |                             |                                | <b><u>Val4</u></b> |                               |                             |                                |           |        |
|                         | $^3J_{\text{HNH}\alpha}$ [Hz] | 6.50                        |                                |                    | $^3J_{\text{HNH}\alpha}$ [Hz] | 6.93                        | NH                             | 7.70      |        |
|                         | NH                            | 8.30                        |                                |                    |                               |                             | CH $\alpha$                    | 4.02      | 61.85  |
|                         | CH $\alpha$                   | 4.30                        | 52.87                          |                    |                               |                             | CO                             |           | n.a.   |
|                         | CO                            |                             | n.a.                           |                    |                               |                             | CH $\beta$                     | 2.26      | 29.93  |
|                         | CH <sub>2</sub> $\beta$ 1     | 1.67                        | 40.96                          |                    |                               |                             | CH <sub>3</sub> $\gamma$       | 0.96      | 19.22  |
|                         | CH <sub>2</sub> $\beta$ 2     | 1.74                        | 40.96                          |                    |                               |                             | CH <sub>3</sub> $\gamma$       | 1.01      | 19.46  |
|                         | CH $\gamma$                   | 1.74                        | 24.85                          |                    |                               |                             |                                |           |        |
|                         | CH <sub>3</sub> $\delta$      | 0.91                        | 21.80                          |                    |                               |                             |                                |           |        |
|                         | CH <sub>3</sub> $\delta$      | 0.95                        | 23.13                          |                    |                               |                             |                                |           |        |
| <b><u>Glu2</u></b>      |                               |                             |                                | <b><u>Leu5</u></b> |                               |                             |                                |           |        |
|                         | $^3J_{\text{HNH}\alpha}$ [Hz] | ca 4.5                      |                                |                    | $^3J_{\text{HNH}\alpha}$ [Hz] | n.d.                        | NH                             | 7.95      |        |
|                         | NH                            | 8.72                        |                                |                    |                               |                             | CH $\alpha$                    | 4.18      | 54.65  |
|                         | CH $\alpha$                   | 4.27                        | 55.78                          |                    |                               |                             | CO                             |           | n.a.   |
|                         | CO                            |                             | 174.31                         |                    |                               |                             | CH <sub>2</sub> $\beta$        | 1.71      | 40.39  |
|                         | CH <sub>2</sub> $\beta$ 1     | 2.04                        | 27.02                          |                    |                               |                             | CH $\gamma$                    | 1.74      | 24.97  |
|                         | CH <sub>2</sub> $\beta$ 2     | 2.15                        | 27.02                          |                    |                               |                             | CH <sub>3</sub> $\delta$       | 0.89      | 21.26  |
|                         | CH <sub>2</sub> $\gamma$      | 2.45                        | 31.38                          |                    |                               |                             | CH <sub>3</sub> $\delta$       | 0.94      | 22.63  |
|                         | CO $\delta$                   |                             | n.a.                           |                    |                               |                             |                                |           |        |
|                         | OH                            | n.a.                        |                                |                    |                               |                             |                                |           |        |
| <b><u>Gln6</u></b>      |                               |                             |                                | <b><u>Gln6</u></b> |                               |                             |                                |           |        |
|                         |                               |                             |                                |                    | $^3J_{\text{HNH}\alpha}$ [Hz] | 6.58                        | NH                             | 8.24      |        |
|                         |                               |                             |                                |                    |                               |                             | CH $\alpha$                    | 4.09      | 53.91  |
|                         |                               |                             |                                |                    |                               |                             | CO                             |           | 172.54 |
|                         |                               |                             |                                |                    |                               |                             | CH <sub>2</sub> $\beta$        | 2.05      | 27.08  |
|                         |                               |                             |                                |                    |                               |                             | CH <sub>2</sub> $\gamma$       | 2.28      | 32.18  |
|                         |                               |                             |                                |                    |                               |                             | CO $\delta$                    |           | n.a.   |
|                         |                               |                             |                                |                    |                               |                             | NH <sub>2</sub>                | 6.55/7.19 |        |
|                         |                               |                             |                                |                    |                               |                             |                                |           |        |
|                         |                               |                             |                                |                    |                               |                             |                                |           |        |

n.d. = not determined

n.a. = not assigned

**Table S6. NMR analysis of xantholysin A.**  $^1\text{H}$  and  $^{13}\text{C}$  NMR assignment of xantholysin A in DMF-d7 solution, 55°C (continued).

| $^1\text{H}$ $\delta$ [ppm] $^{13}\text{C}$ $\delta$ [ppm] |      |                           |           | $^1\text{H}$ $\delta$ [ppm] $^{13}\text{C}$ $\delta$ [ppm] |      |                            |           |
|------------------------------------------------------------|------|---------------------------|-----------|------------------------------------------------------------|------|----------------------------|-----------|
| <b>Ser7</b>                                                |      |                           |           | <b>Leu11</b>                                               |      |                            |           |
| $^3J_{\text{HNH}\alpha}$ [Hz]                              | 5.32 | NH                        | 7.89      | $^3J_{\text{HNH}\alpha}$ [Hz]                              | n.d. | NH                         | 7.95      |
|                                                            |      | CH $\alpha$               | 4.58      |                                                            |      | CH $\alpha$                | 4.32      |
|                                                            |      | CO                        |           |                                                            |      | CO                         | 53.62     |
|                                                            |      | CH <sub>2</sub> $\beta$ 1 | 64.01     |                                                            |      | CH <sub>2</sub> $\beta$ 1  | 173.51    |
|                                                            |      | CH <sub>2</sub> $\beta$ 2 | 4.38      |                                                            |      | CH <sub>2</sub> $\beta$ 2  | 41.18     |
|                                                            |      |                           | 4.50      |                                                            |      | CH $\gamma$                | 41.18     |
|                                                            |      |                           |           |                                                            |      | CH <sub>3</sub> $\delta$   | 24.94     |
|                                                            |      |                           |           |                                                            |      | CH <sub>3</sub> $\delta$   | 21.92     |
|                                                            |      |                           |           |                                                            |      | CH <sub>3</sub> $\delta$   | 22.91     |
| <b>Val8</b>                                                |      |                           |           | <b>Leu12</b>                                               |      |                            |           |
| $^3J_{\text{HNH}\alpha}$ [Hz]                              | 6.79 | NH                        | 8.20      | $^3J_{\text{HNH}\alpha}$ [Hz]                              | 7.12 | NH                         | 7.79      |
|                                                            |      | CH $\alpha$               | 4.09      |                                                            |      | CH $\alpha$                | 4.34      |
|                                                            |      | CO                        |           |                                                            |      | CO                         | 53.23     |
|                                                            |      | CH $\beta$                | 173.90    |                                                            |      | CH <sub>2</sub> $\beta$    | 173.76    |
|                                                            |      | CH <sub>3</sub> $\gamma$  | 2.40      |                                                            |      | CH <sub>2</sub> $\beta$    | 1.71      |
|                                                            |      | CH <sub>3</sub> $\gamma$  | 0.98      |                                                            |      | CH $\gamma$                | 1.76      |
|                                                            |      |                           | 1.08      |                                                            |      | CH <sub>3</sub> $\delta$   | 25.02     |
|                                                            |      |                           |           |                                                            |      | CH <sub>3</sub> $\delta$   | 21.61     |
|                                                            |      |                           |           |                                                            |      | CH <sub>3</sub> $\delta$   | 23.33     |
| <b>Leu9</b>                                                |      |                           |           | <b>Gln13</b>                                               |      |                            |           |
| $^3J_{\text{HNH}\alpha}$ [Hz]                              | n.d. | NH                        | 8.03      | $^3J_{\text{HNH}\alpha}$ [Hz]                              | 6.70 | NH                         | 7.25      |
|                                                            |      | CH $\alpha$               | 4.20      |                                                            |      | CH $\alpha$                | 4.25      |
|                                                            |      | CO                        |           |                                                            |      | CO                         | 54.27     |
|                                                            |      | CH <sub>2</sub> $\beta$ 1 | 174.04    |                                                            |      | CH <sub>2</sub> $\beta$ 1  | 172.30    |
|                                                            |      | CH <sub>2</sub> $\beta$ 2 | 1.59      |                                                            |      | CH <sub>2</sub> $\beta$ 2  | 27.32     |
|                                                            |      | CH $\gamma$               | 1.84      |                                                            |      | CH <sub>2</sub> $\beta$ 2  | 2.32      |
|                                                            |      | CH <sub>3</sub> $\delta$  | 1.83      |                                                            |      | CH <sub>2</sub> $\gamma$   | 2.22      |
|                                                            |      | CH <sub>3</sub> $\delta$  | 0.87      |                                                            |      | CO $\delta$                | n.a.      |
|                                                            |      | CH <sub>3</sub> $\delta$  | 0.92      |                                                            |      | NH <sub>2</sub>            | 6.63/7.19 |
|                                                            |      |                           | 23.05     |                                                            |      |                            |           |
| <b>Gln10</b>                                               |      |                           |           | <b>Ile14</b>                                               |      |                            |           |
| $^3J_{\text{HNH}\alpha}$ [Hz]                              | 6.84 | NH                        | 7.74      | $^3J_{\text{HNH}\alpha}$ [Hz]                              | 8.51 | NH                         | 7.48      |
|                                                            |      | CH $\alpha$               | 4.33      |                                                            |      | CH $\alpha$                | 4.37      |
|                                                            |      | CO                        |           |                                                            |      | CO                         | n.a.      |
|                                                            |      | CH <sub>2</sub> $\beta$ 1 | 172.98    |                                                            |      | CH $\beta$                 | 1.89      |
|                                                            |      | CH <sub>2</sub> $\beta$ 2 | 2.04      |                                                            |      | CH <sub>3</sub> $\gamma$   | 37.06     |
|                                                            |      | CH <sub>2</sub> $\gamma$  | 2.18      |                                                            |      | CH <sub>2</sub> $\gamma$ 1 | 15.82     |
|                                                            |      | CO $\delta$               | 2.38      |                                                            |      | CH <sub>2</sub> $\gamma$ 2 | 25.30     |
|                                                            |      | NH <sub>2</sub>           | n.a.      |                                                            |      | CH <sub>3</sub> $\delta$   | 25.30     |
|                                                            |      |                           | 6.55/7.19 |                                                            |      |                            | 11.00     |

n.d. = not determined

n.a. = not assigned
